# Supplementary material
Source: ML conference proceedings conference paper supplement (https://openreview.net/forum?id=6URyQ9QhYv)
Supplement: supplementary_material [file attachment]

## 560 Supplementary Materials

### 561 The risks of extrapolation

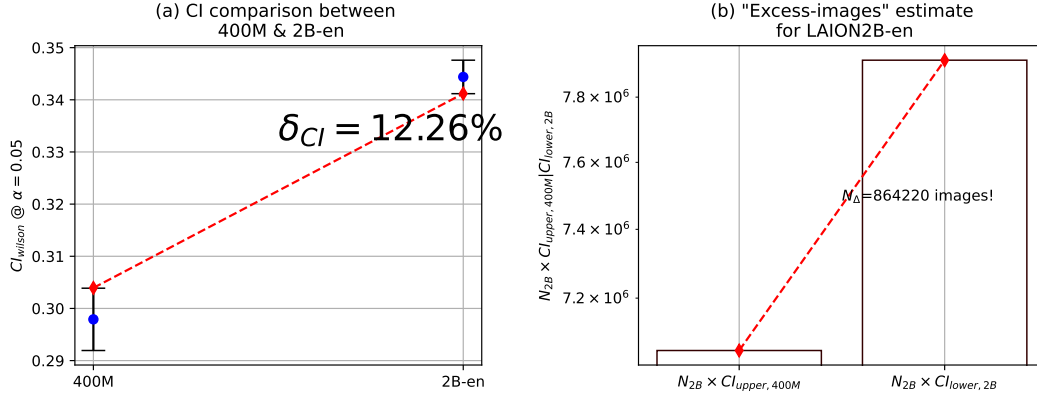

Figure 3: Binomial proportion confidence interval (CI) analysis to establish the extent of HCR underestimation upon using LAION400M statistics.

### 562 NSFW Analysis

|      | NSFW $\geq 0.5$ |          |            | NSFW $< 0.5$ |          |            |
|------|-----------------|----------|------------|--------------|----------|------------|
|      | hateful         | targeted | aggressive | hateful      | targeted | aggressive |
| mean | 0.749           | 0.356    | 0.104      | 0.021        | 0.013    | 0.011      |
| min  | 0.501           | 0.008    | 0.013      | 0.00         | 0.013    | 0.005      |
| max  | 0.988           | 0.961    | 0.894      | 1.00         | 0.499    | 0.513      |

Table 3: The mean, minimum and maximum values for hateful, targeted and aggressive content in our sample of LAION 2B-En, divided according to the suggested NSFW threshold of 0.5.
