# Supplementary material
Source: ML conference proceedings conference paper supplement (https://openreview.net/forum?id=6URyQ9QhYv)

Any-of-the-3

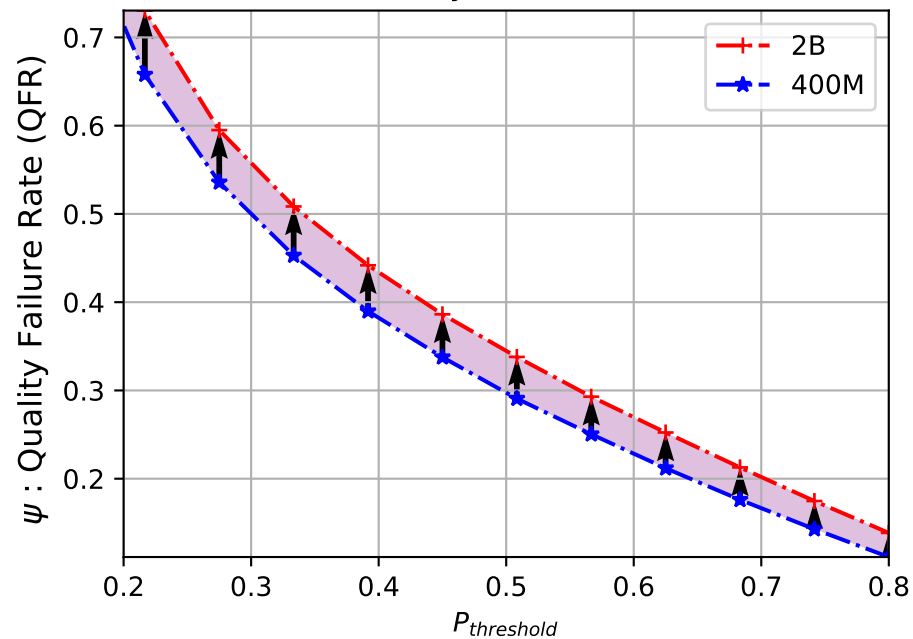

hateful

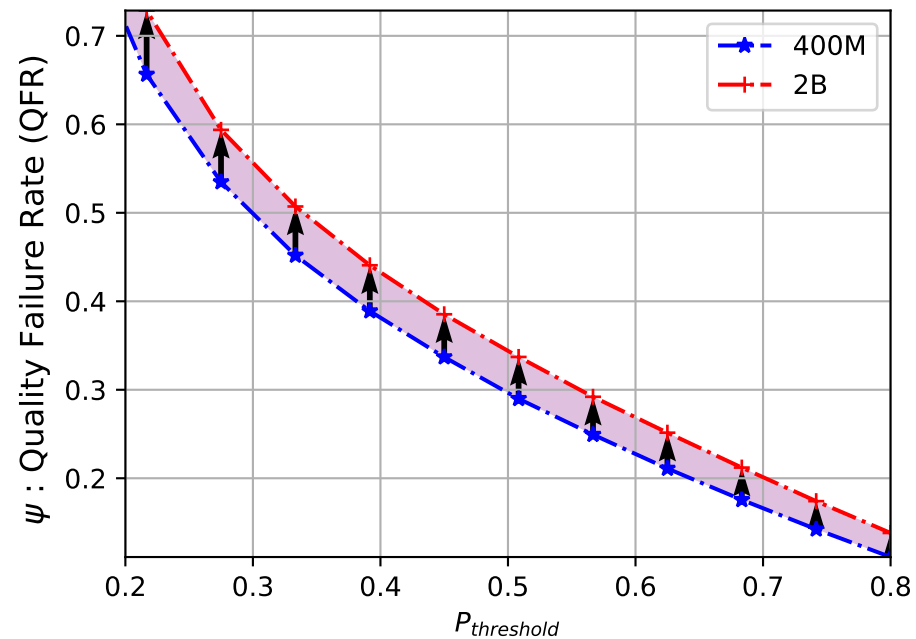

targeted

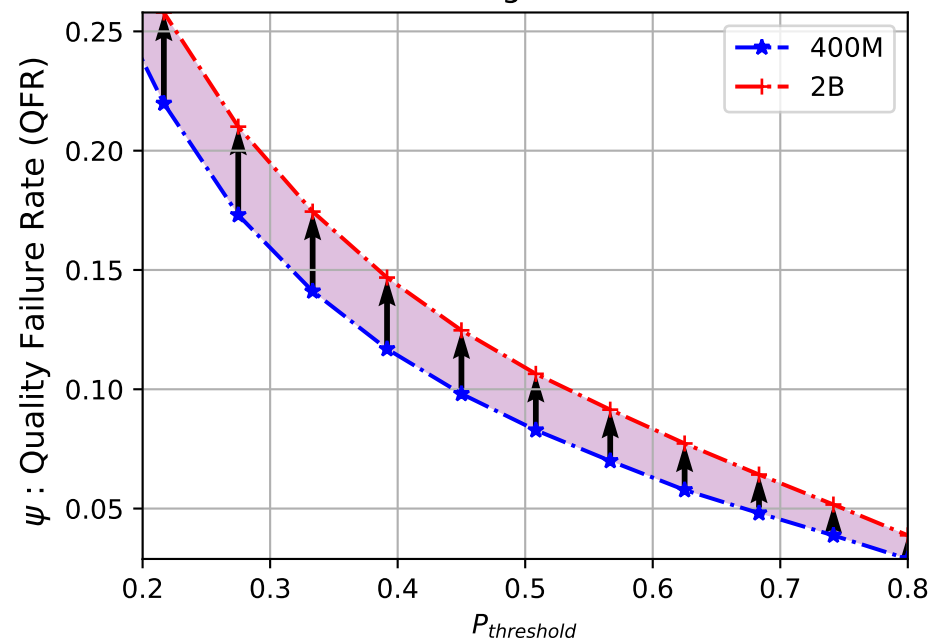

aggressive

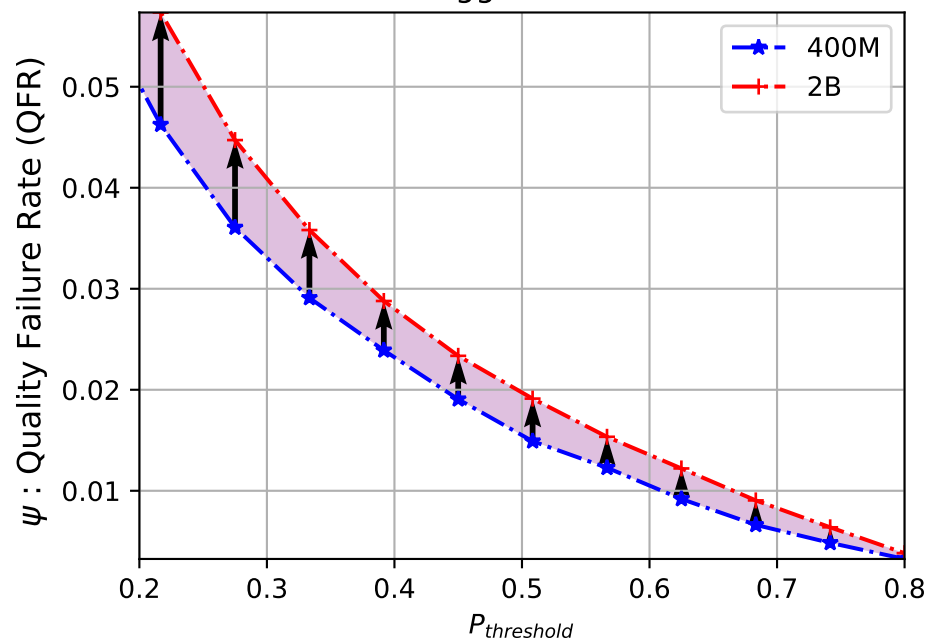

Supplement: supplementary_material [file attachment]

(a) CI comparison between  
400M & 2B-en

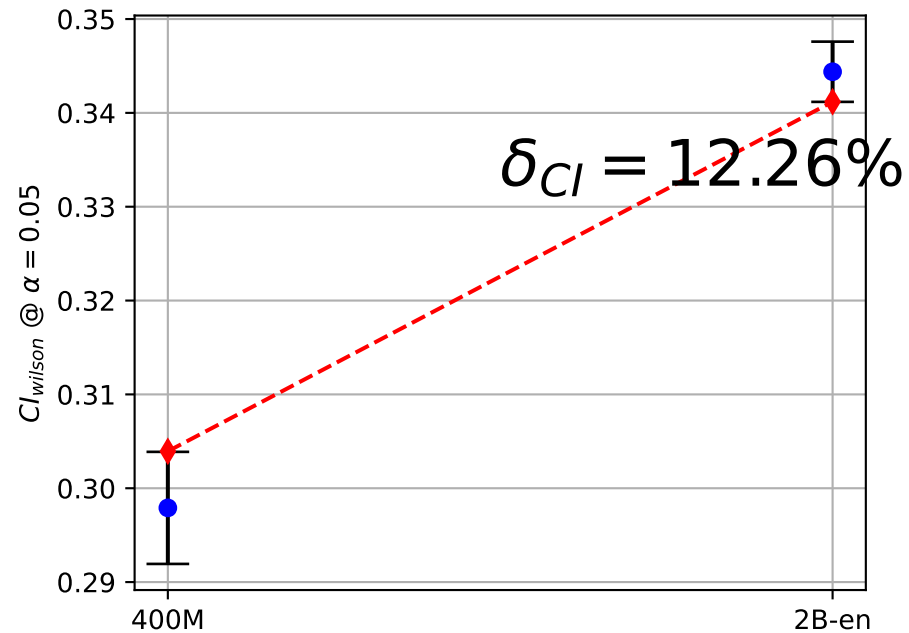

(b) "Excess-images" estimate  
for LAION2B-en

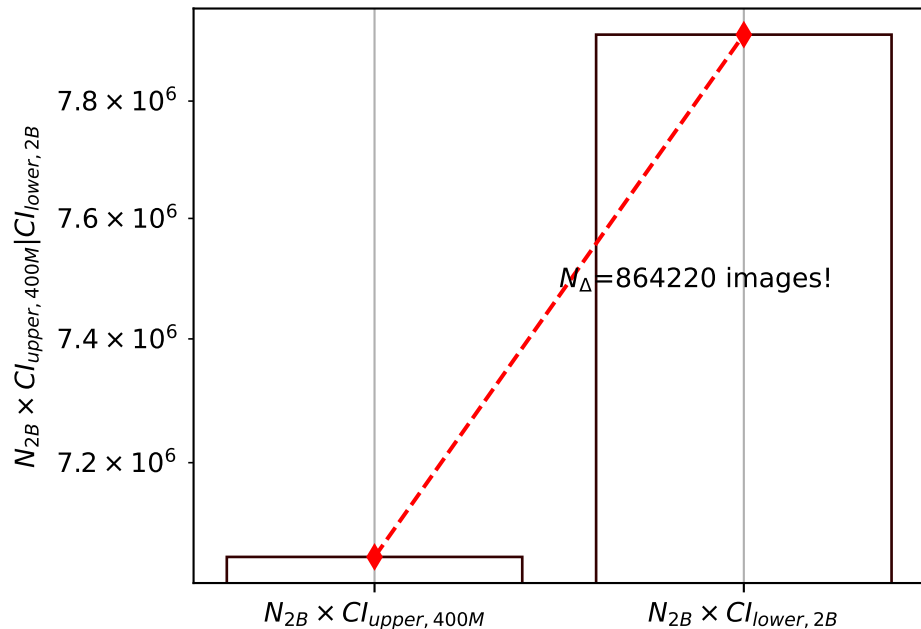

Supplement: supplementary_material [file attachment]

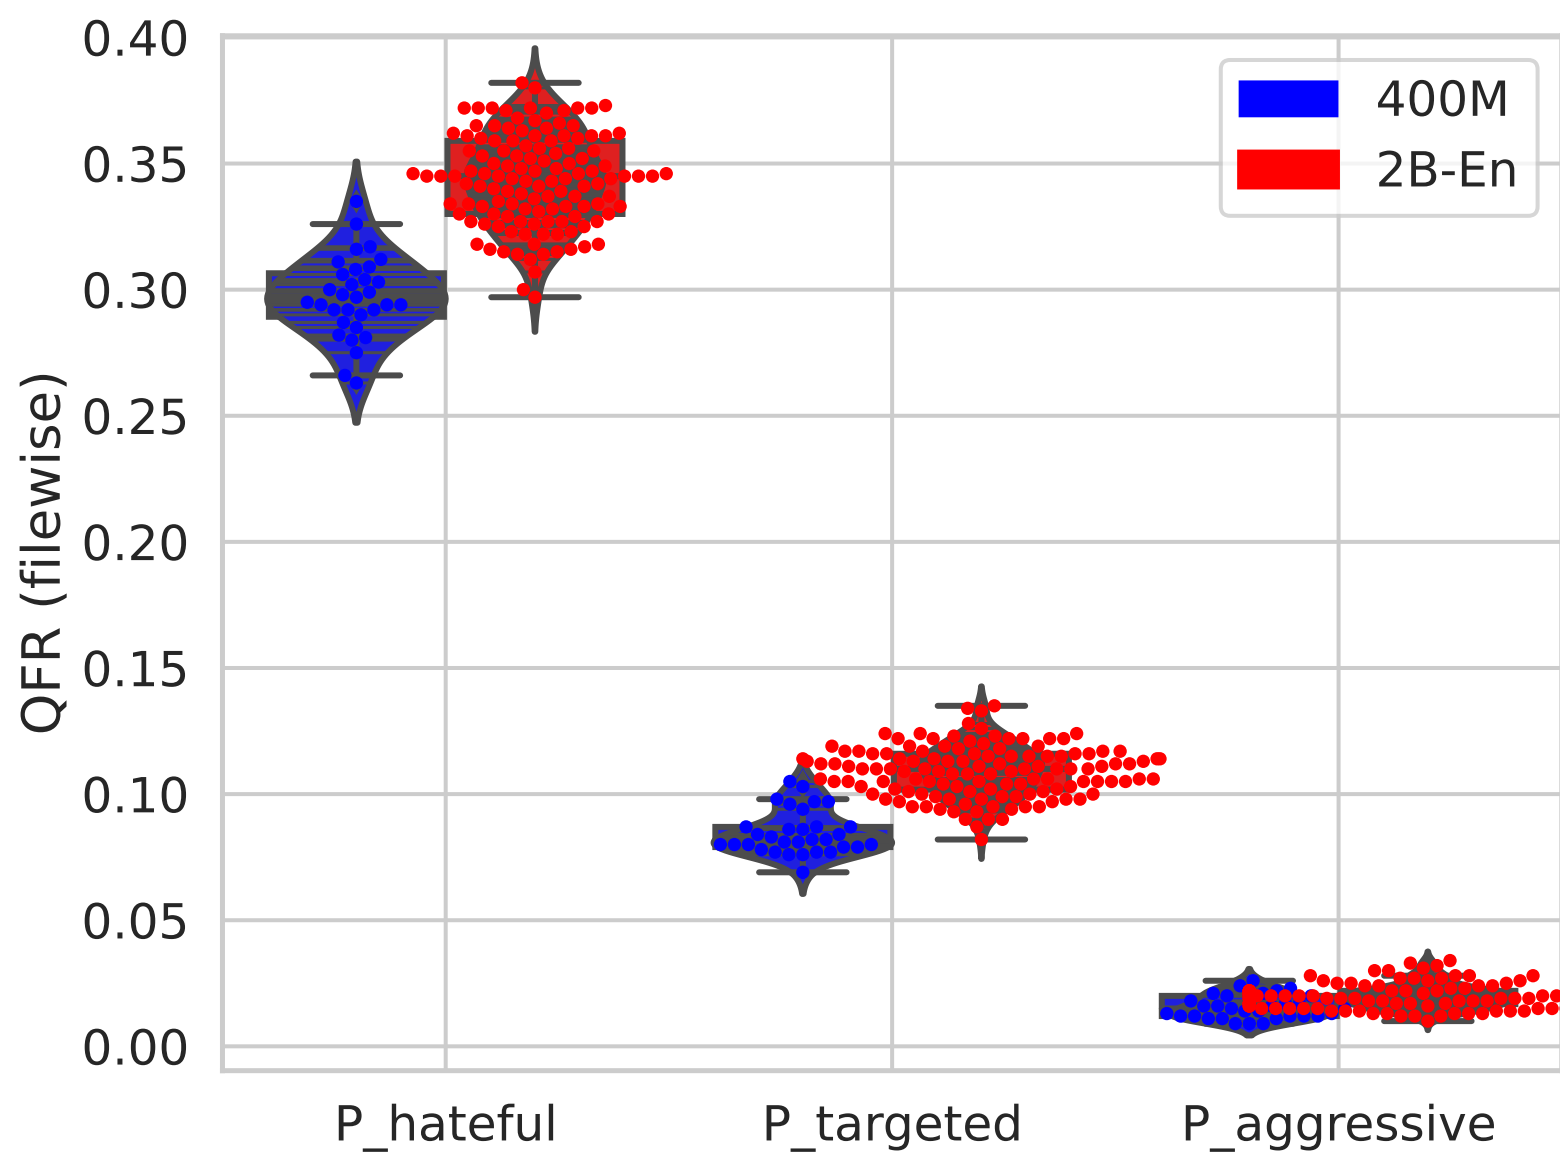

Supplement: supplementary_material [file attachment]
